# Supplementary material
Source: PubMed Central journal article supplement (PMC6788874)
Supplement: fetalneonatal-2018-315147supp001.pdf [file fetalneonatal-2018-315147supp001.pdf]

***Text S1. Details of trust-level data quality checks and comparison of included and excluded records***

NHS trusts were excluded from the analysis if they failed one or more of the following assessments:

**Birthweight**

- More than 30% of birth records were missing the birthweight field

*Number of trusts excluded: 12*

**Gestational age**

- More than 30% of birth records were missing the gestational age field

and/or

- The proportion of all births that took place between 39 and 42 completed weeks of gestation was less than 60% or more than 90%

*Number of trusts excluded: 5*

**NAOI component procedures and diagnoses**

- The trust had a recorded incidence of one or more of the NAOI components that was above or below 5 standard deviations of the national mean incidence.

*Number of trusts excluded: 6*

<sup>1</sup> Manktelow BN, Smith LK, Seaton SE, et al. MBRRACE-UK Perinatal Mortality Surveillance Report, UK Perinatal Deaths for Births from January to December 2014. Leicester: The Infant Mortality and Morbidity Studies, Department of Health Sciences, University of Leicester; 2016.

**Table S1. Definition of E-NAOI component procedures and diagnoses and incidence (per 100 births) among all eligible infants (n = 484,007)**

| <b>Component</b>                                                                                             | <b>Codes</b>                                                                                                                                                                                                                                                                                                                          | <b>Incidence</b> |
|--------------------------------------------------------------------------------------------------------------|---------------------------------------------------------------------------------------------------------------------------------------------------------------------------------------------------------------------------------------------------------------------------------------------------------------------------------------|------------------|
| Birthweight <1500g                                                                                           | HES baby tail: birthweight <1500g                                                                                                                                                                                                                                                                                                     | 0.81             |
| Gestational age <32 weeks                                                                                    | HES baby tail: gestational age <32 weeks                                                                                                                                                                                                                                                                                              | 0.89             |
| Neonatal death within 28 days (includes deaths after 28 days if the infant was never discharged home)        | HES: Discharge method 4;<br>ONS: death within 28 days of birth;                                                                                                                                                                                                                                                                       | 0.18             |
| Respiratory distress syndrome                                                                                | ICD-10: P22.0                                                                                                                                                                                                                                                                                                                         | 1.99             |
| Seizure                                                                                                      | ICD-10: P90; R56                                                                                                                                                                                                                                                                                                                      | 0.16             |
| Intraventricular haemorrhage (grades 3 and 4)                                                                | ICD-10: P52.2                                                                                                                                                                                                                                                                                                                         | 0.04             |
| Cerebral infarction                                                                                          | ICD-10: I63                                                                                                                                                                                                                                                                                                                           | 0.01             |
| Periventricular leukomalacia                                                                                 | ICD-10: P91.2                                                                                                                                                                                                                                                                                                                         | 0.01             |
| Birth trauma (intracranial haemorrhage paralysis due to brachial plexus injury, skull or long bone fracture) | ICD-10: P10.0-3; P13.0; P13.2-3; P14.0-1                                                                                                                                                                                                                                                                                              | 0.08             |
| Hypoxic ischemic encephalopathy                                                                              | ICD-10: P91.6; P91.8; P91.5                                                                                                                                                                                                                                                                                                           | 0.22             |
| Necrotising enterocolitis                                                                                    | ICD-10: P77                                                                                                                                                                                                                                                                                                                           | 0.11             |
| Sepsis/septicaemia (streptococcus staphylococcus, E.coli, unspecified gram negative)                         | ICD-10: P36.0-8; B95.1; B96.2                                                                                                                                                                                                                                                                                                         | 0.41             |
| Pneumonia                                                                                                    | ICD-10: P23; J12-18                                                                                                                                                                                                                                                                                                                   | 0.24             |
| Other respiratory (primary atelectasis, respiratory failure)                                                 | ICD-10: P28.0; P28.5                                                                                                                                                                                                                                                                                                                  | 0.13             |
| Chronic respiratory disease originating in the perinatal period                                              | ICD-10: P27                                                                                                                                                                                                                                                                                                                           | 0.25             |
| Bacterial meningitis                                                                                         | ICD-10: G00-03; G05                                                                                                                                                                                                                                                                                                                   | 0.06             |
| Resuscitation                                                                                                | OPCS: X50; X56;<br>HES baby tail: biresus 5 - 6                                                                                                                                                                                                                                                                                       | 0.58             |
| Ventilatory support (mechanical ventilation and/or CPAP)                                                     | OPCS: E85.1-2; E85-8-9                                                                                                                                                                                                                                                                                                                | 3.63             |
| Central venous or arterial catheter                                                                          | OPCS: L91.0-5; O15.2; O15.3                                                                                                                                                                                                                                                                                                           | 0.97             |
| Pneumothorax requiring intercostal catheter                                                                  | OPCS: T12.2; T12.4<br>ICD-10: P25.1                                                                                                                                                                                                                                                                                                   | 0.26             |
| Any IV fluids                                                                                                | OPCS: X29; X35.8-9                                                                                                                                                                                                                                                                                                                    | 0.37             |
| Transfusion of blood or blood products                                                                       | OPCS: X33; X34.0-3; X32.1; X32.8-9; X47                                                                                                                                                                                                                                                                                               | 0.03             |
| Any body cavity surgical procedure                                                                           | OPCS: A01-08; A10-22; A38-51; A57; B01-25; C01-09; G01-22; G24-82; H01-50; H62-70; J01-09; J16; J18-23; J26-72; J76; K01-12; K14; K17-48; K52-56; K66-75; L01-02; L04-12; L16-25; L29-30; L33-34; L37-38; L41-42; L45-46; L48-53; L56-62; L65-70; L73-82; M01-08; M16-83; Q03-11; Q22-54; T01-17; T28-57; V03-68; X45-46; X53-55; X58 | 0.44             |
| Therapeutic hypothermia                                                                                      | OPCS: X51.1-2                                                                                                                                                                                                                                                                                                                         | 0.11             |

**Table S2. Characteristics of included and excluded records**

| <b>Characteristic</b>                         | <b>Included records (%)</b> | <b>Excluded records (%)</b> | <b>P value</b> |
|-----------------------------------------------|-----------------------------|-----------------------------|----------------|
| Maternal age <20                              | 3.71                        | 3.18                        | <0.001         |
| Maternal age 20-34                            | 75.88                       | 73.71                       |                |
| Maternal age >=35                             | 20.41                       | 23.12                       |                |
| Primiparous                                   | 36.46                       | 42.25                       | <0.001         |
| Male infant                                   | 51.30                       | 51.26                       | <0.001         |
| Multiple birth                                | 2.77                        | 2.32                        | <0.001         |
| Short gestation/low birth weight (ICD-10 P07) | 7.64                        | 8.45                        | <0.001         |
